# Supplementary material for: Identification of Universally Applicable and Species-Specific Marker Peptides for Bacillus anthracis
Source: MDPI journal article supplement (doi:10.3390/life12101549), 2022-10-06
Supplement: s1 [file s1]

**Supplementary Mass Spectra:** On the following pages, a mass spectrum is given for each of the eleven species-specific candidate marker peptides for BA. For every annotated spectrum the identified fragments, peptide sequence, as well as the respective Prokka annotation are given, together with information regarding the precursor m/z, its charge and search engine score.

QLSDVAEEDVNR, Short-chain-enoyl-CoA hydratase

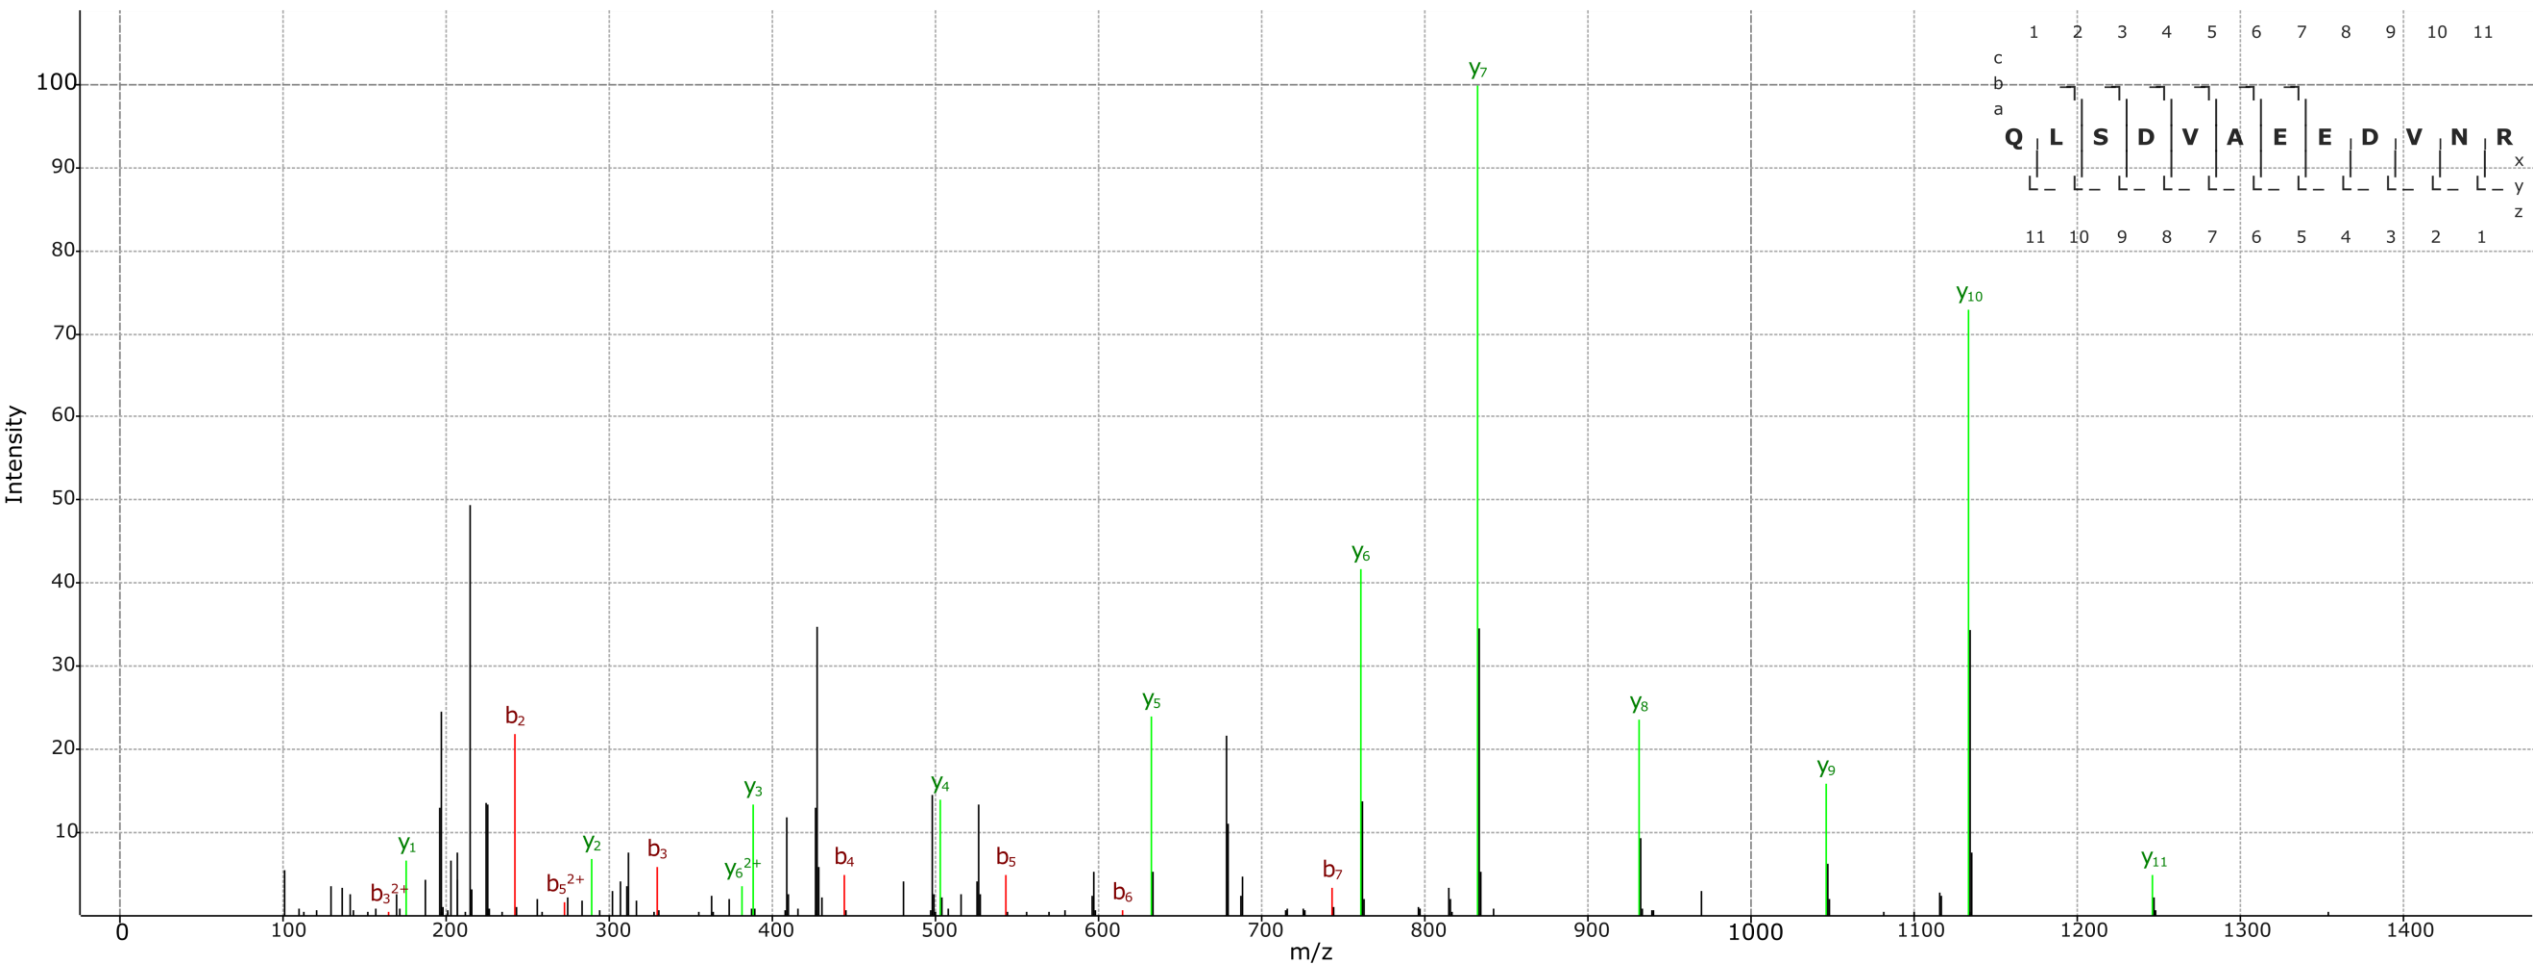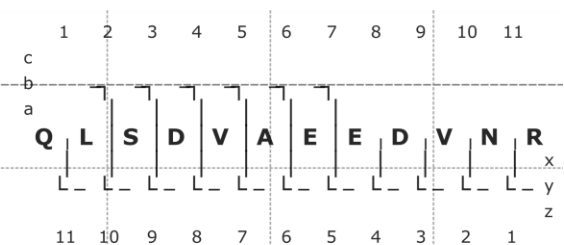

Precursor m/z: 687.8  
Peptide charge: 2  
Score: 9.53E-16

EINGQAQTQTTVTETK, putative peptidoglycan endopeptidase LytE

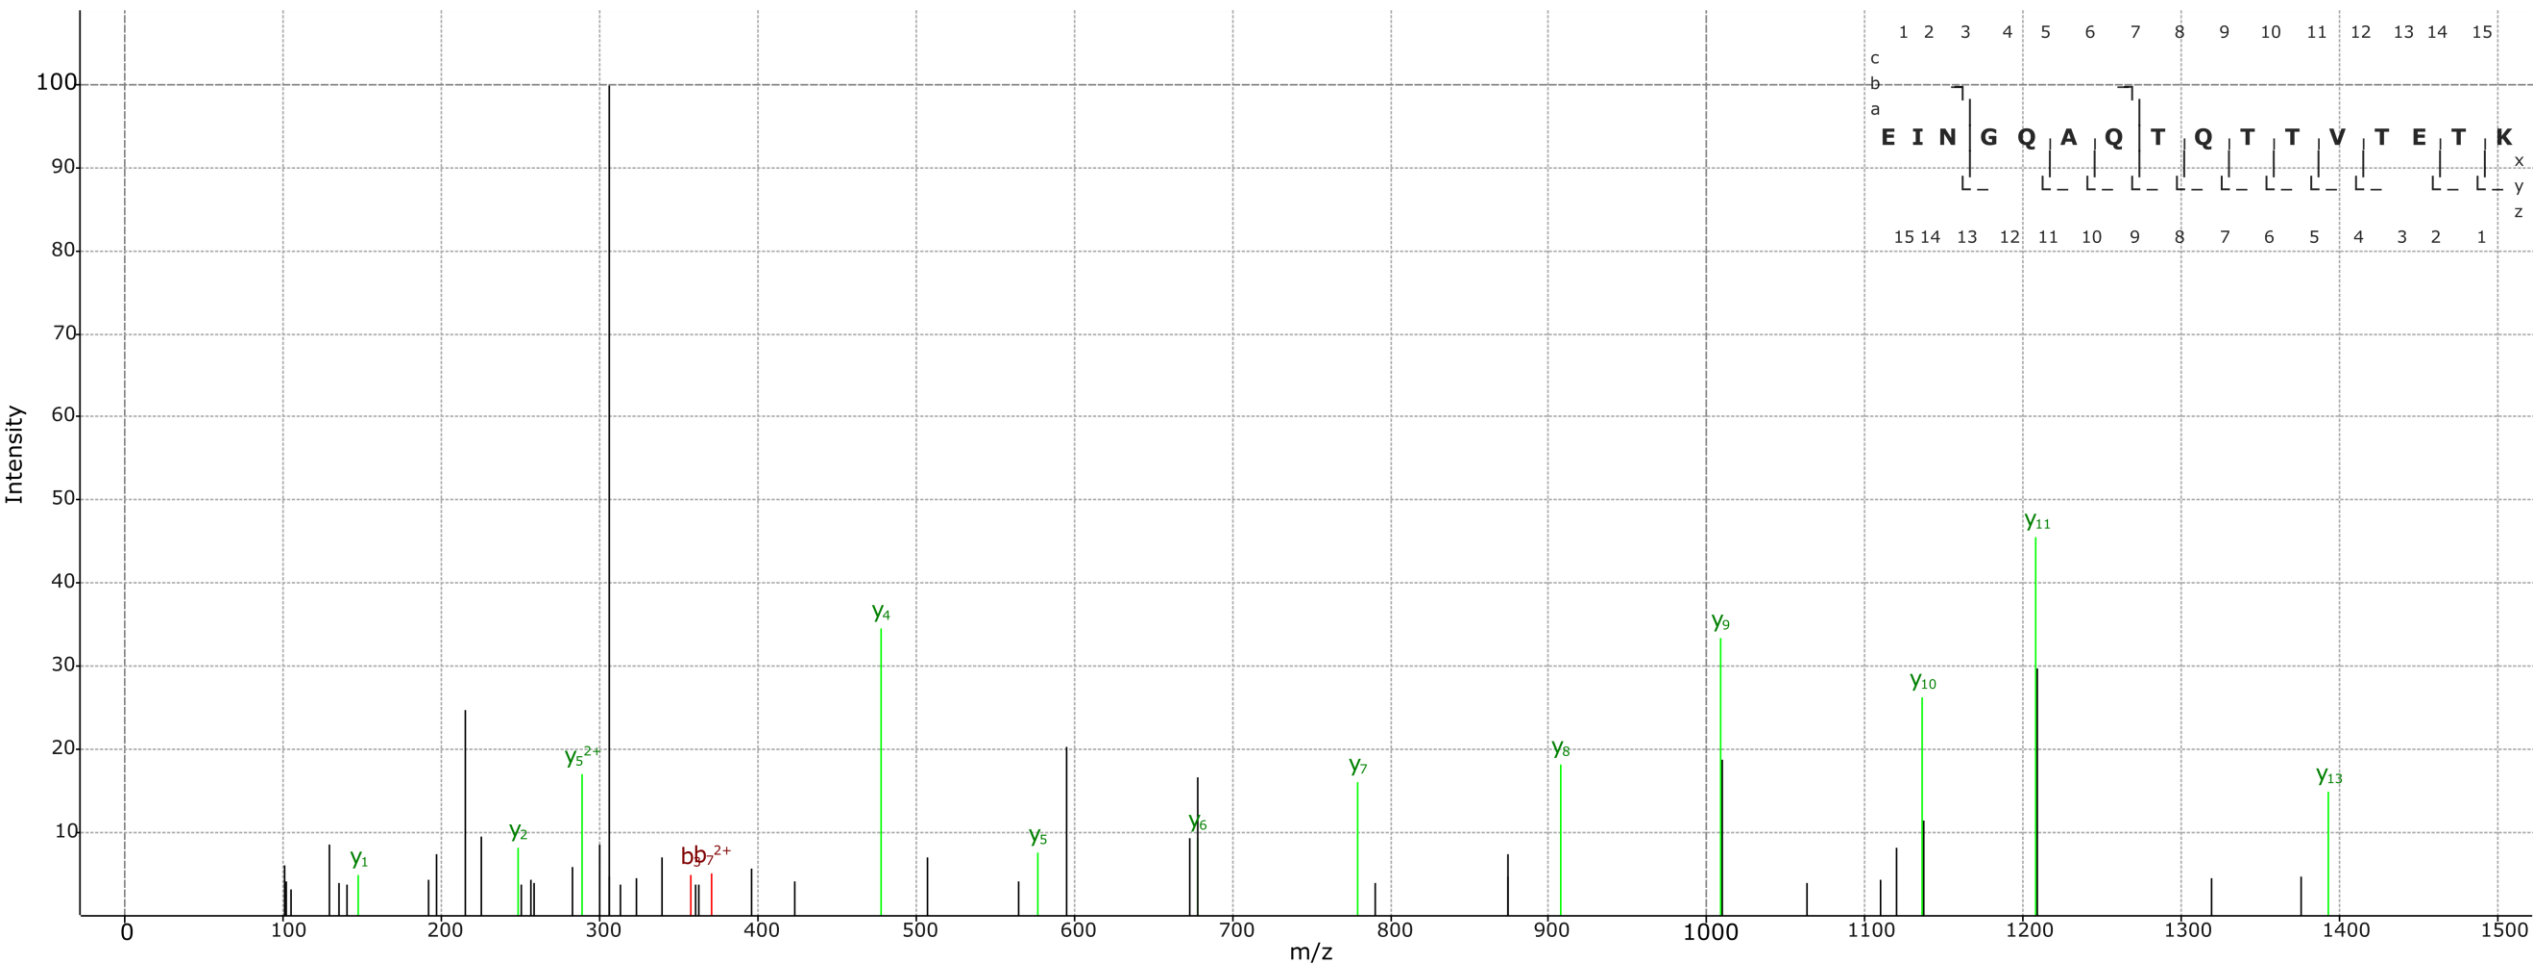

Precursor m/z: 874.9  
Peptide charge: 2  
Score: 8.49E-19

FQMGNQHYSIDVHK, hypothetical protein

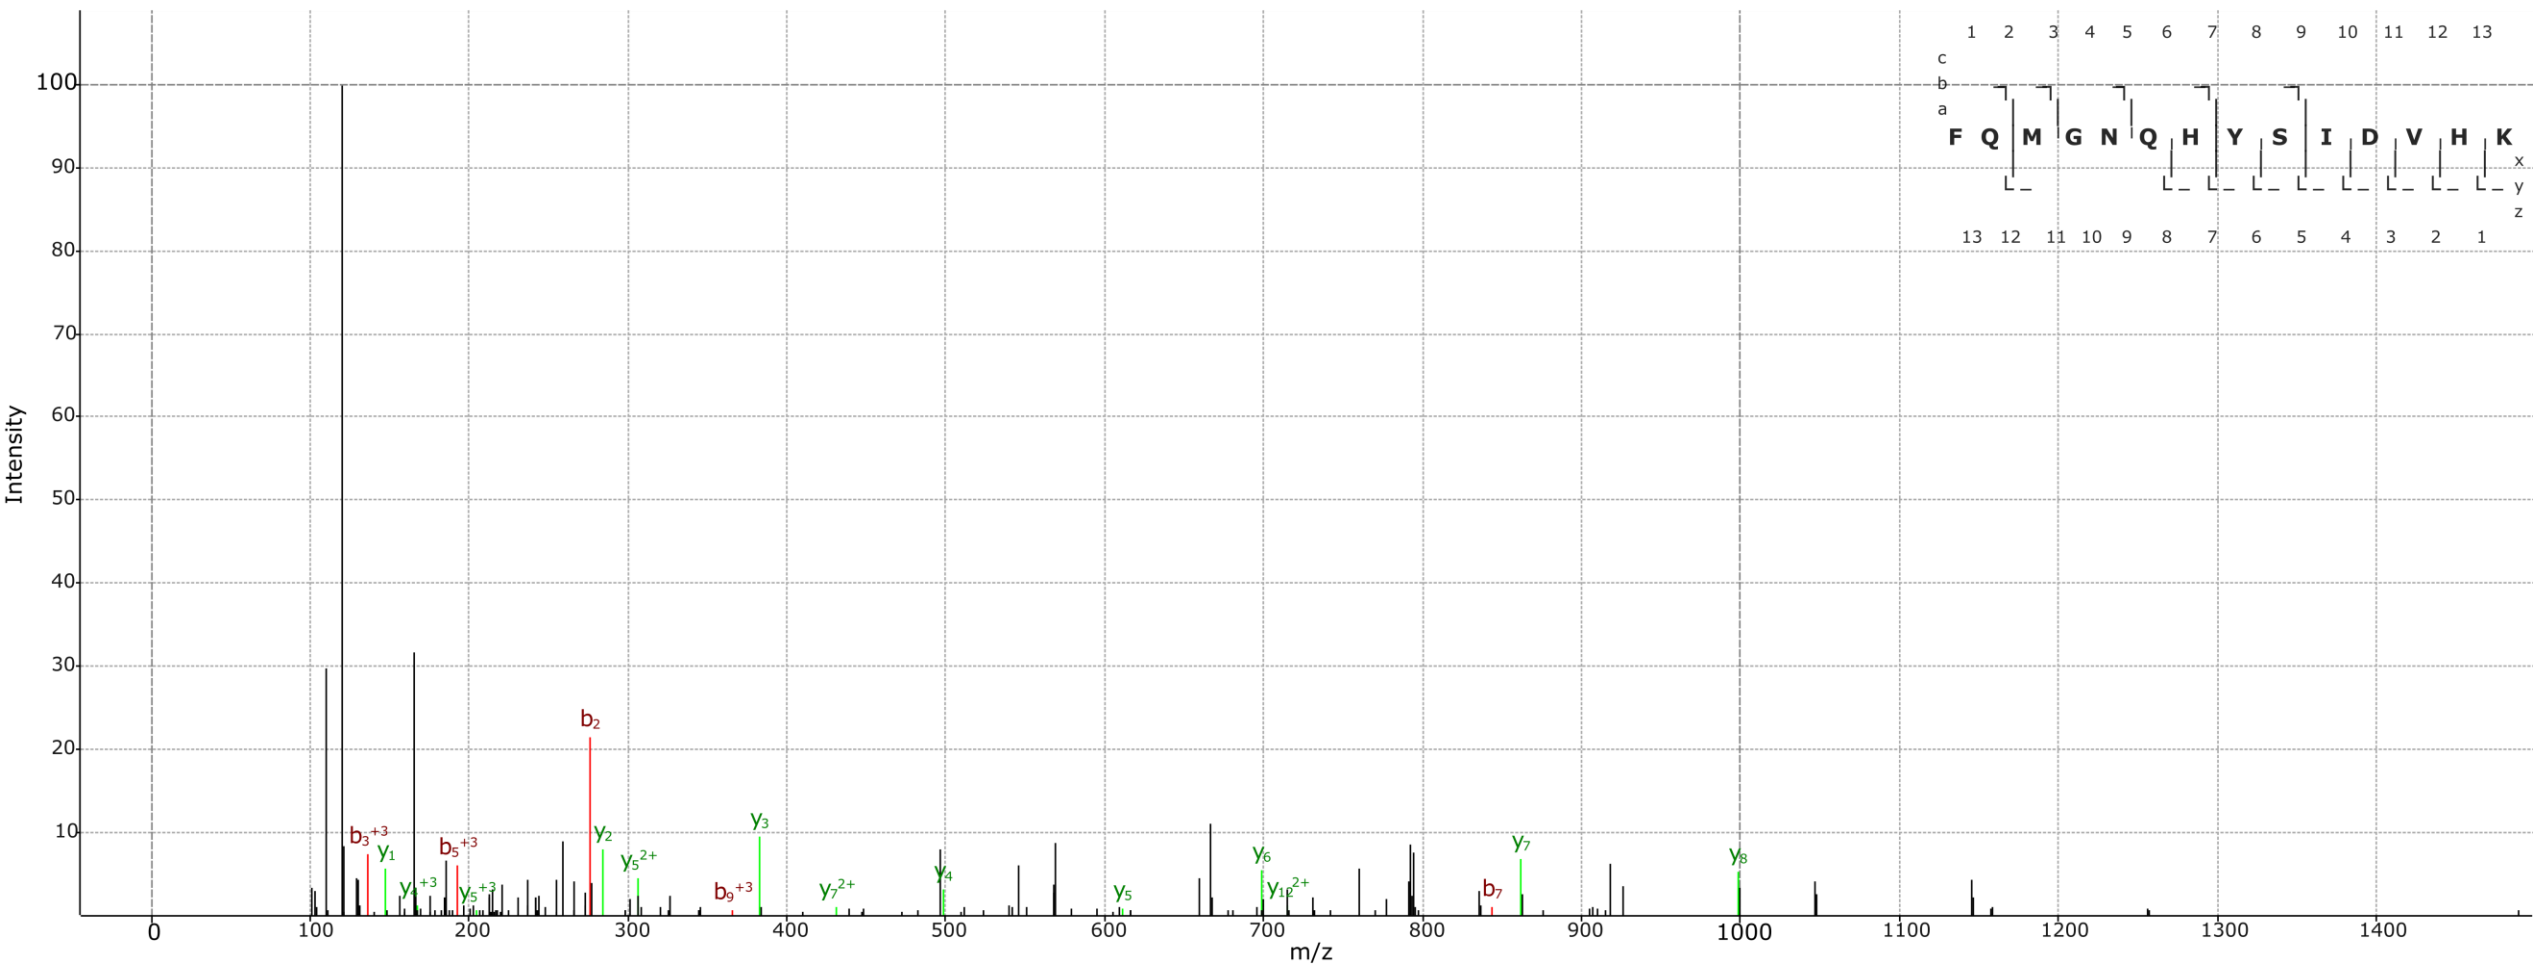

Precursor m/z: 568.6  
Peptide charge: 3  
Score: 6.53E-15

FFETHDYK, Spore germination protein YaaH

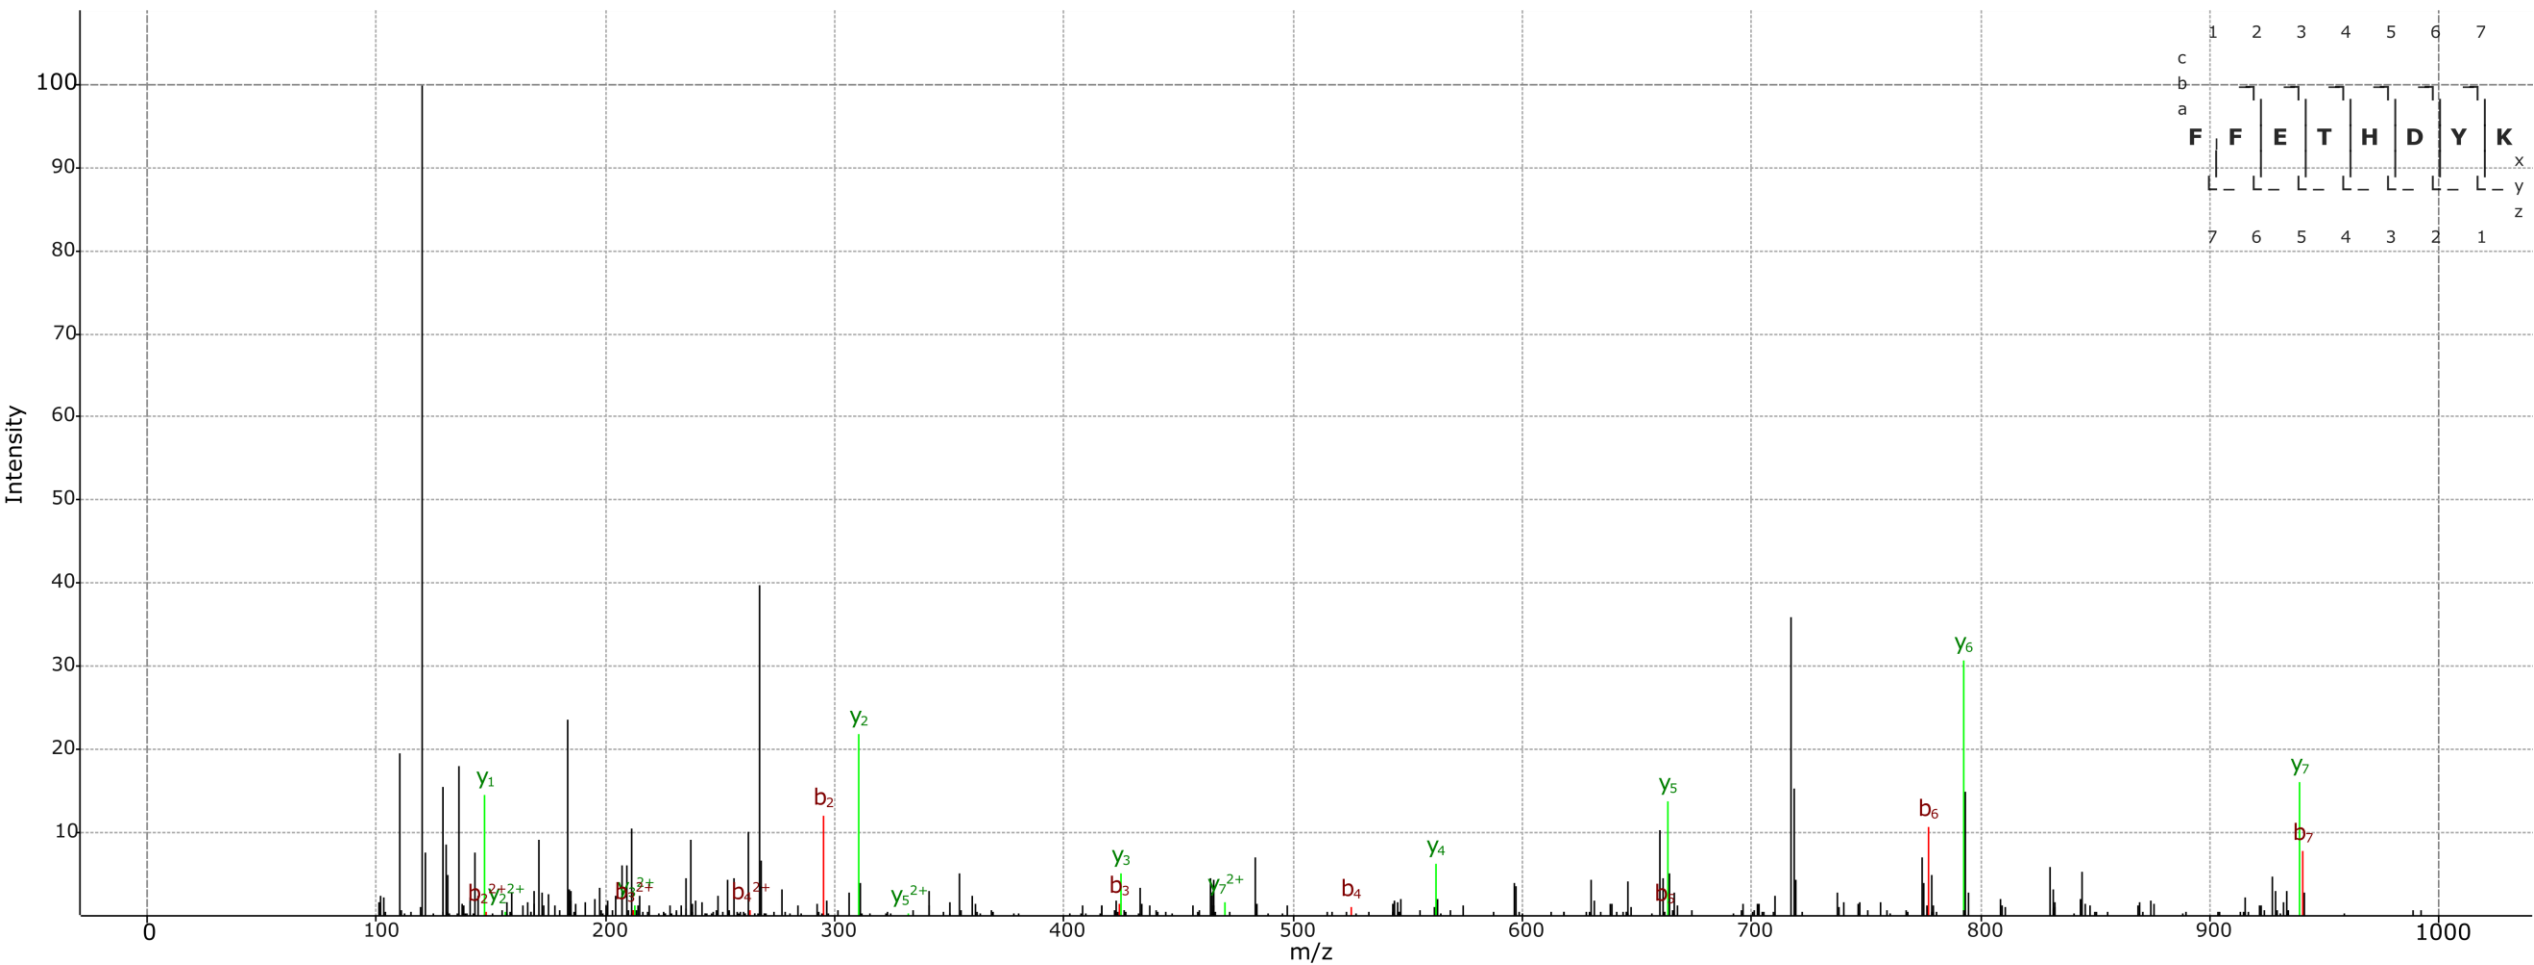

Precursor m/z: 544.3  
Peptide charge: 2  
Score: 4.30E-12

TPGHGIYTGK, Asparagine synthetase [glutamine-hydrolyzing] 3

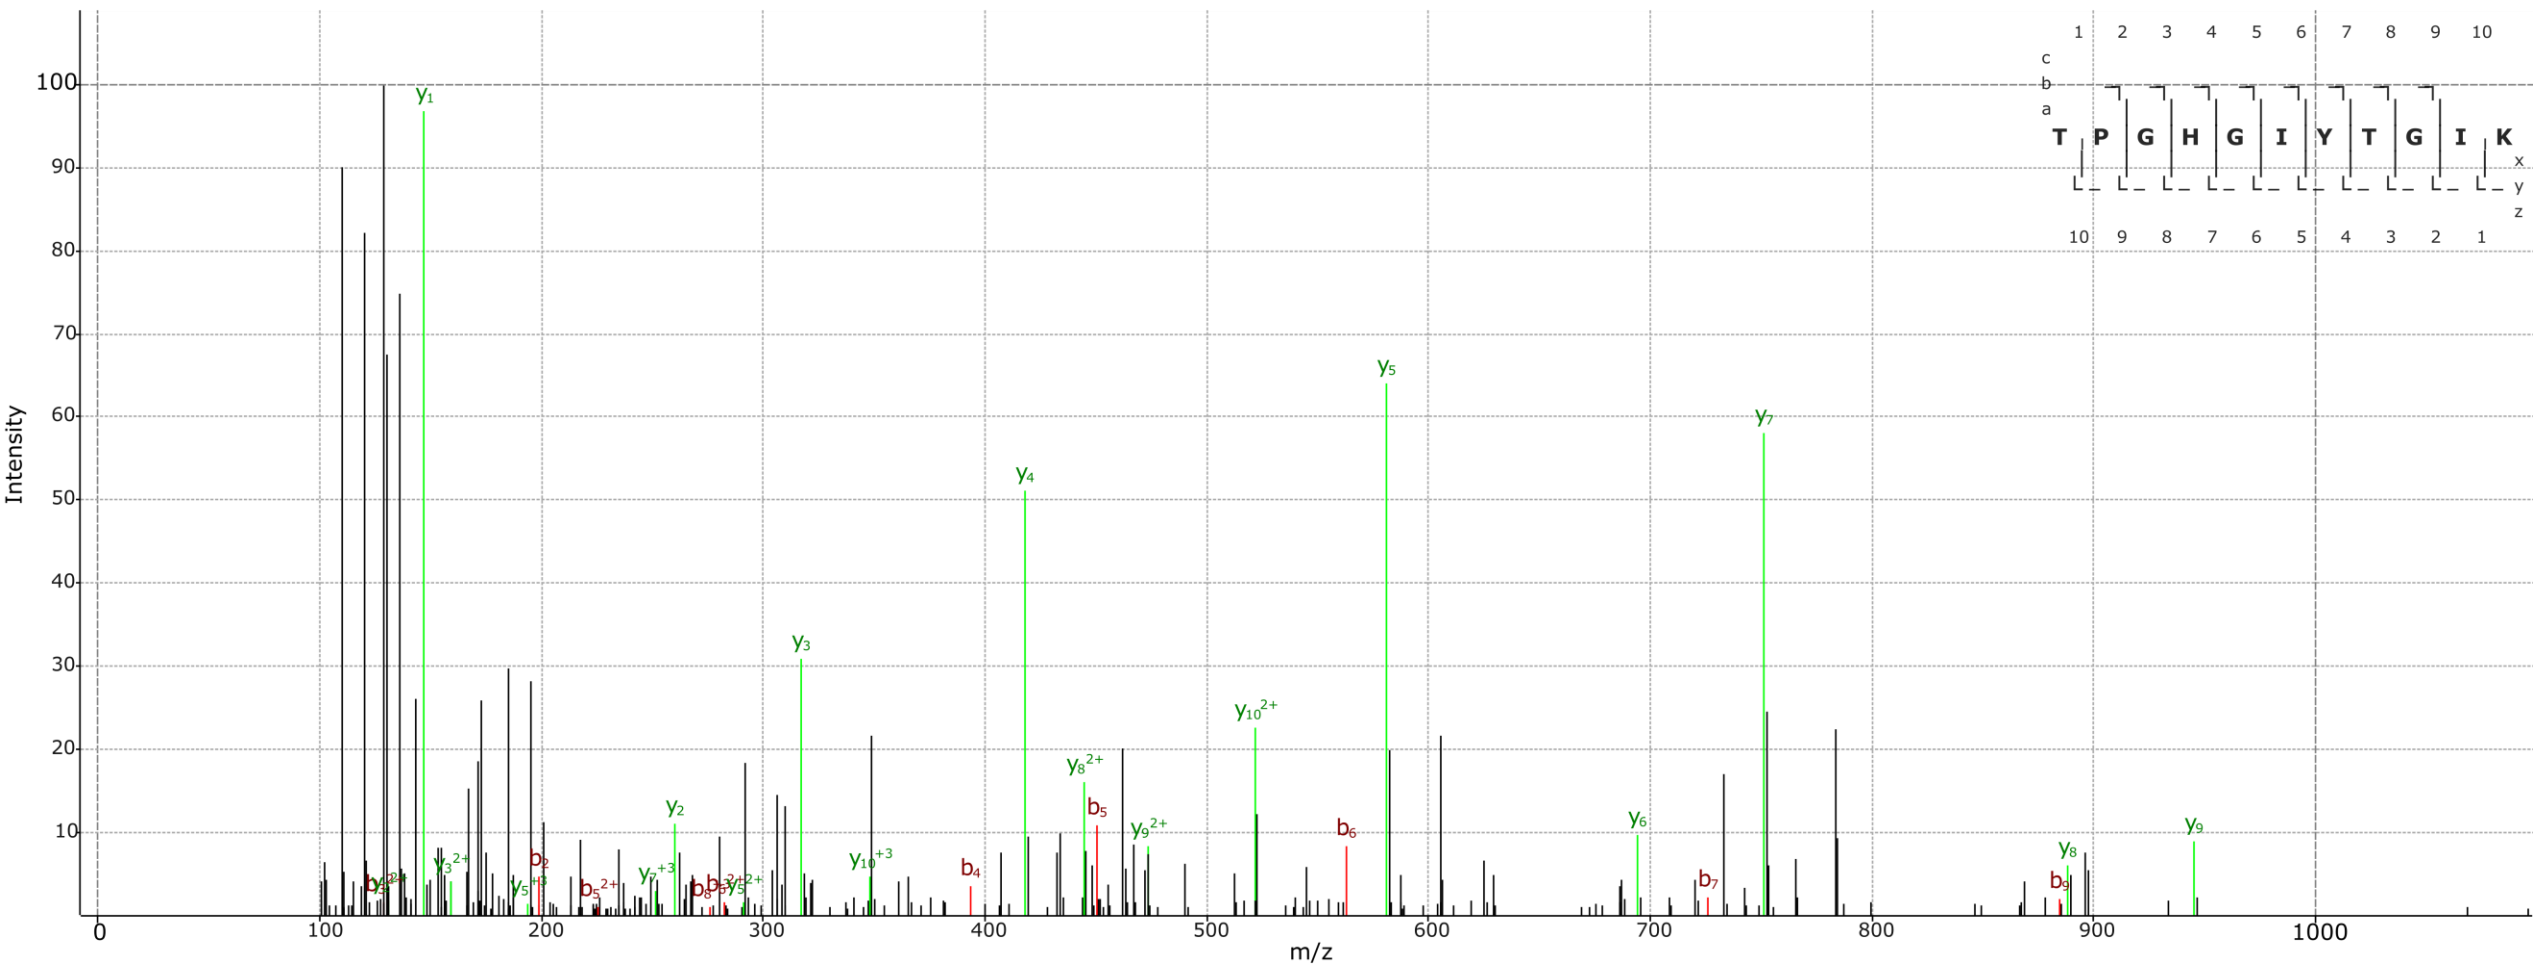

Precursor m/z: 381.9  
Peptide charge: 3  
Score: 7.04E-15

NIAQGGAALATDTK, p-aminobenzoyl-glutamate hydrolase subunit B

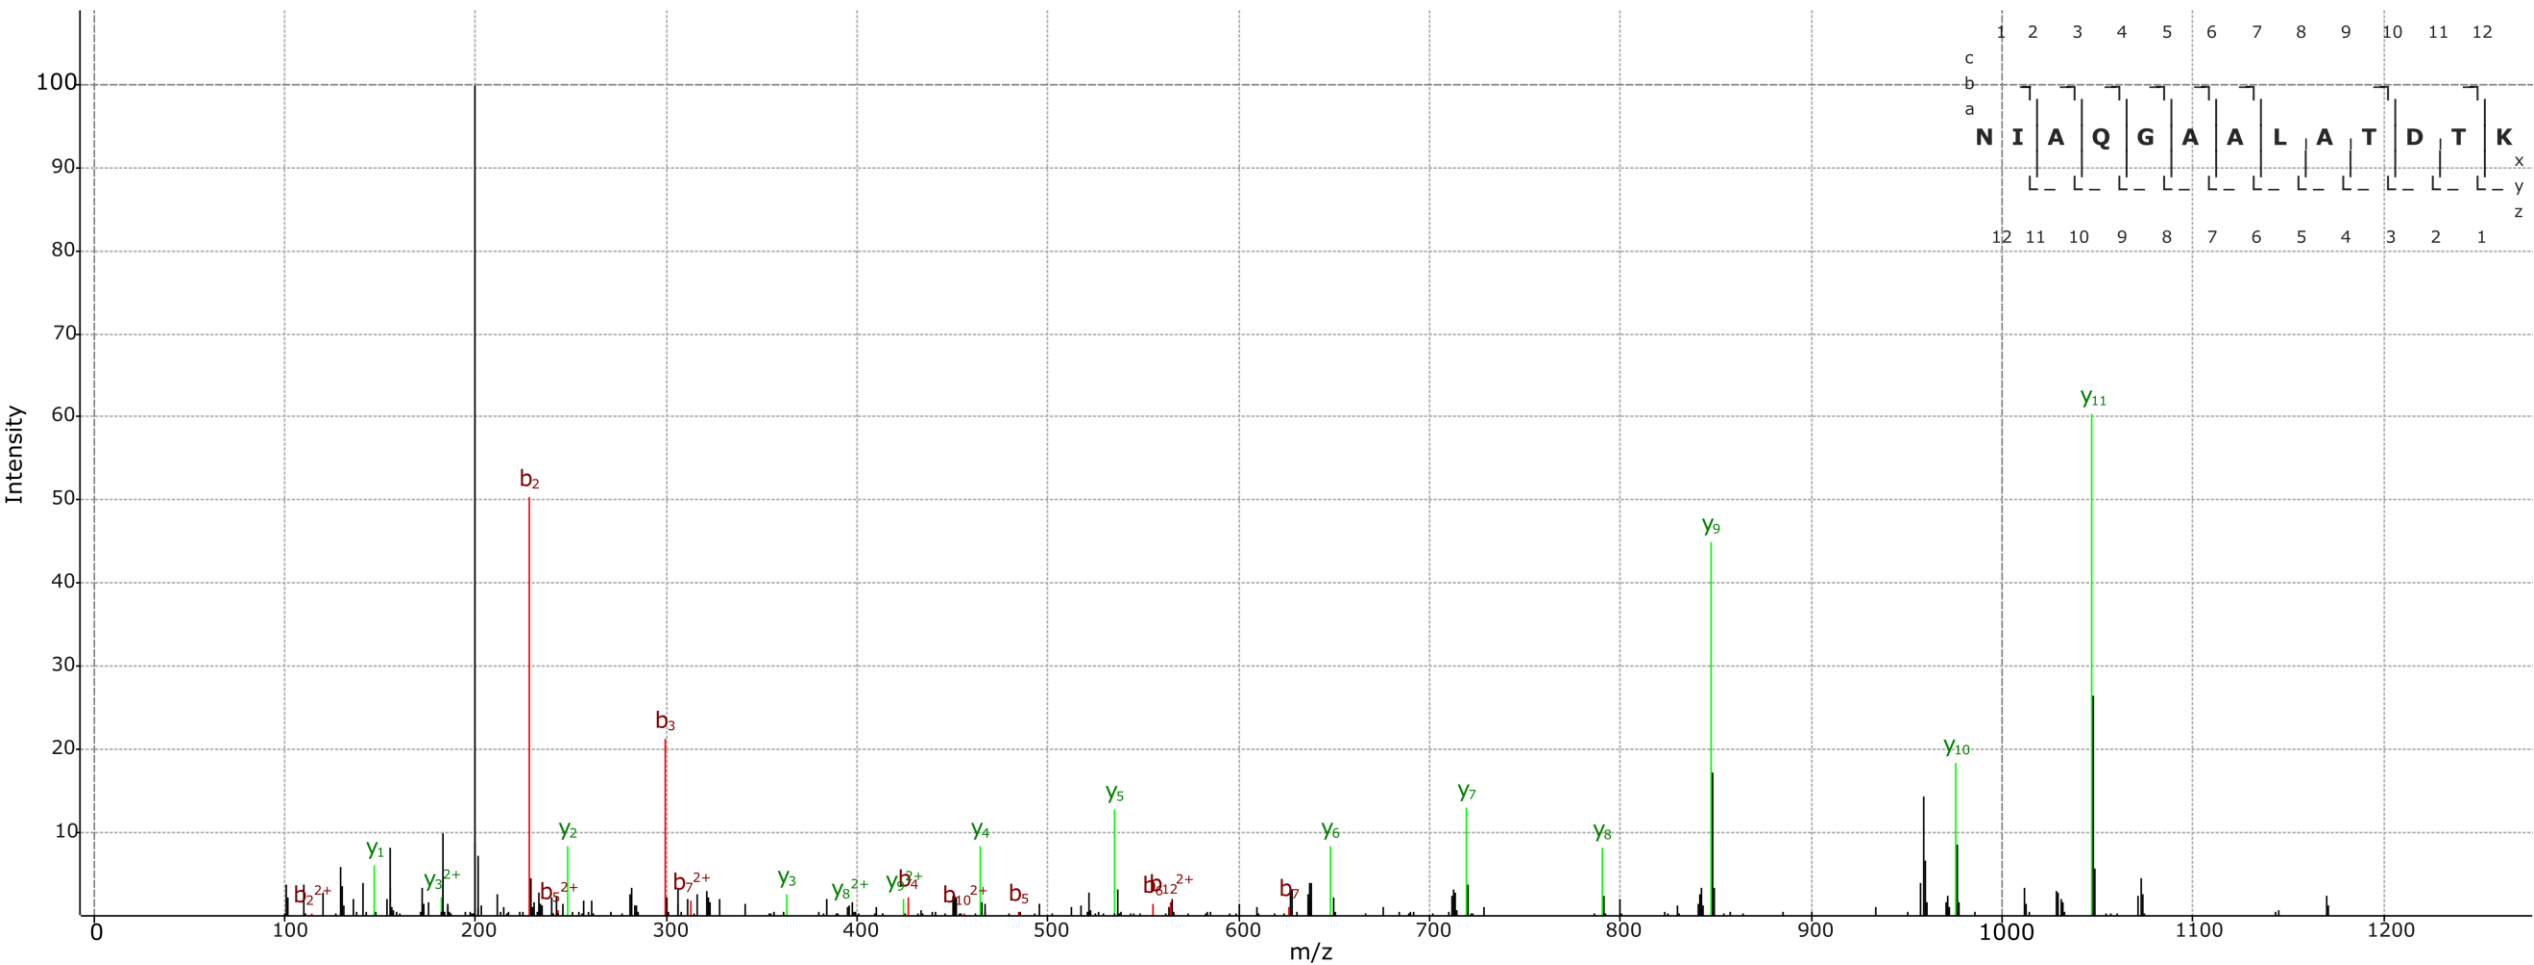

Precursor m/z: 637.3  
Peptide charge: 2  
Score: 1.35E-15

# TLDNAVEELTQITGQK, 50S ribosomal protein L5

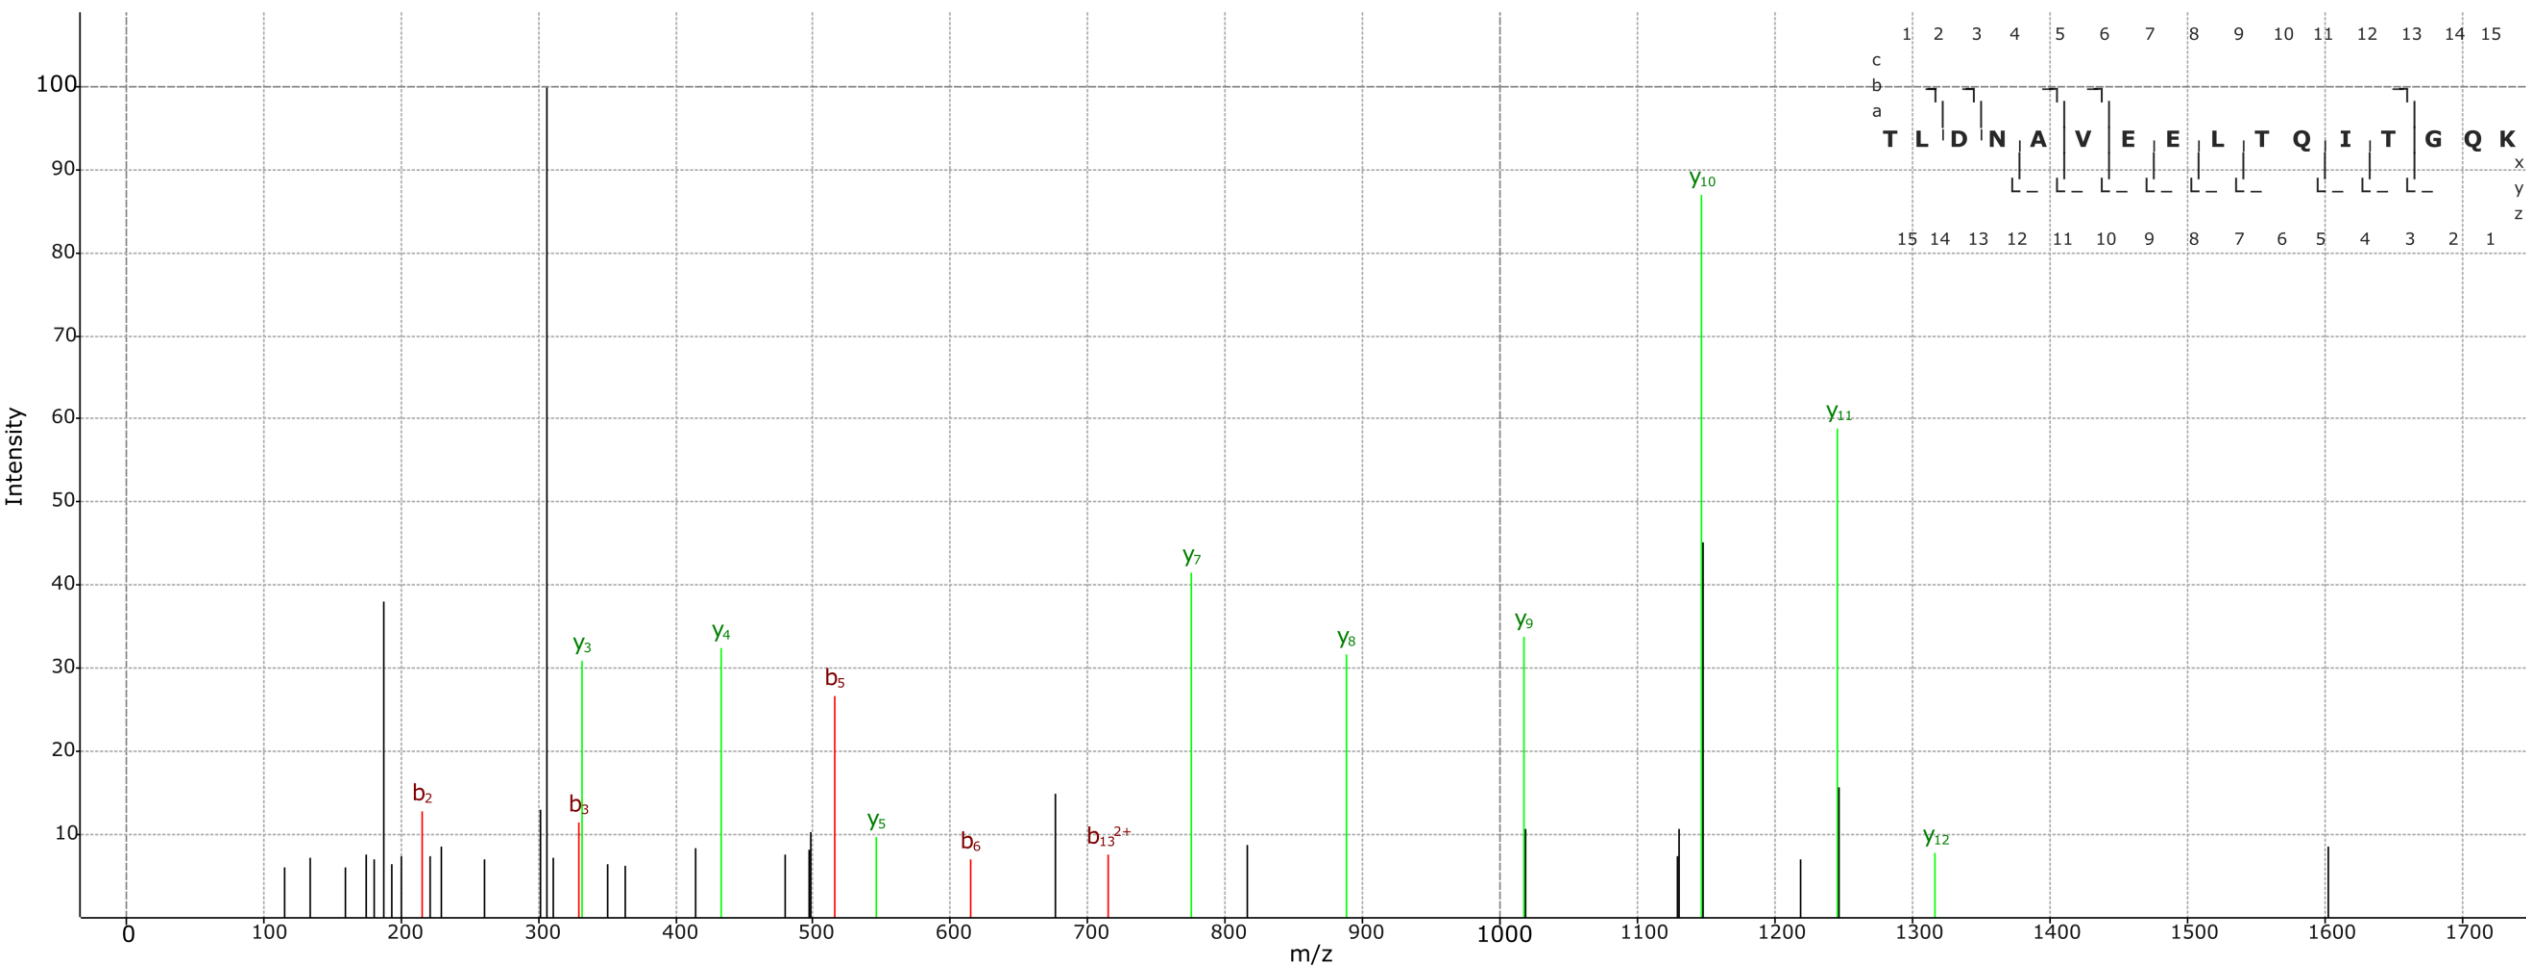

Precursor m/z: 880.5  
 Peptide charge: 2  
 Score: 3.60E-15

EDSPLVTLTGK, PhoH-like protein

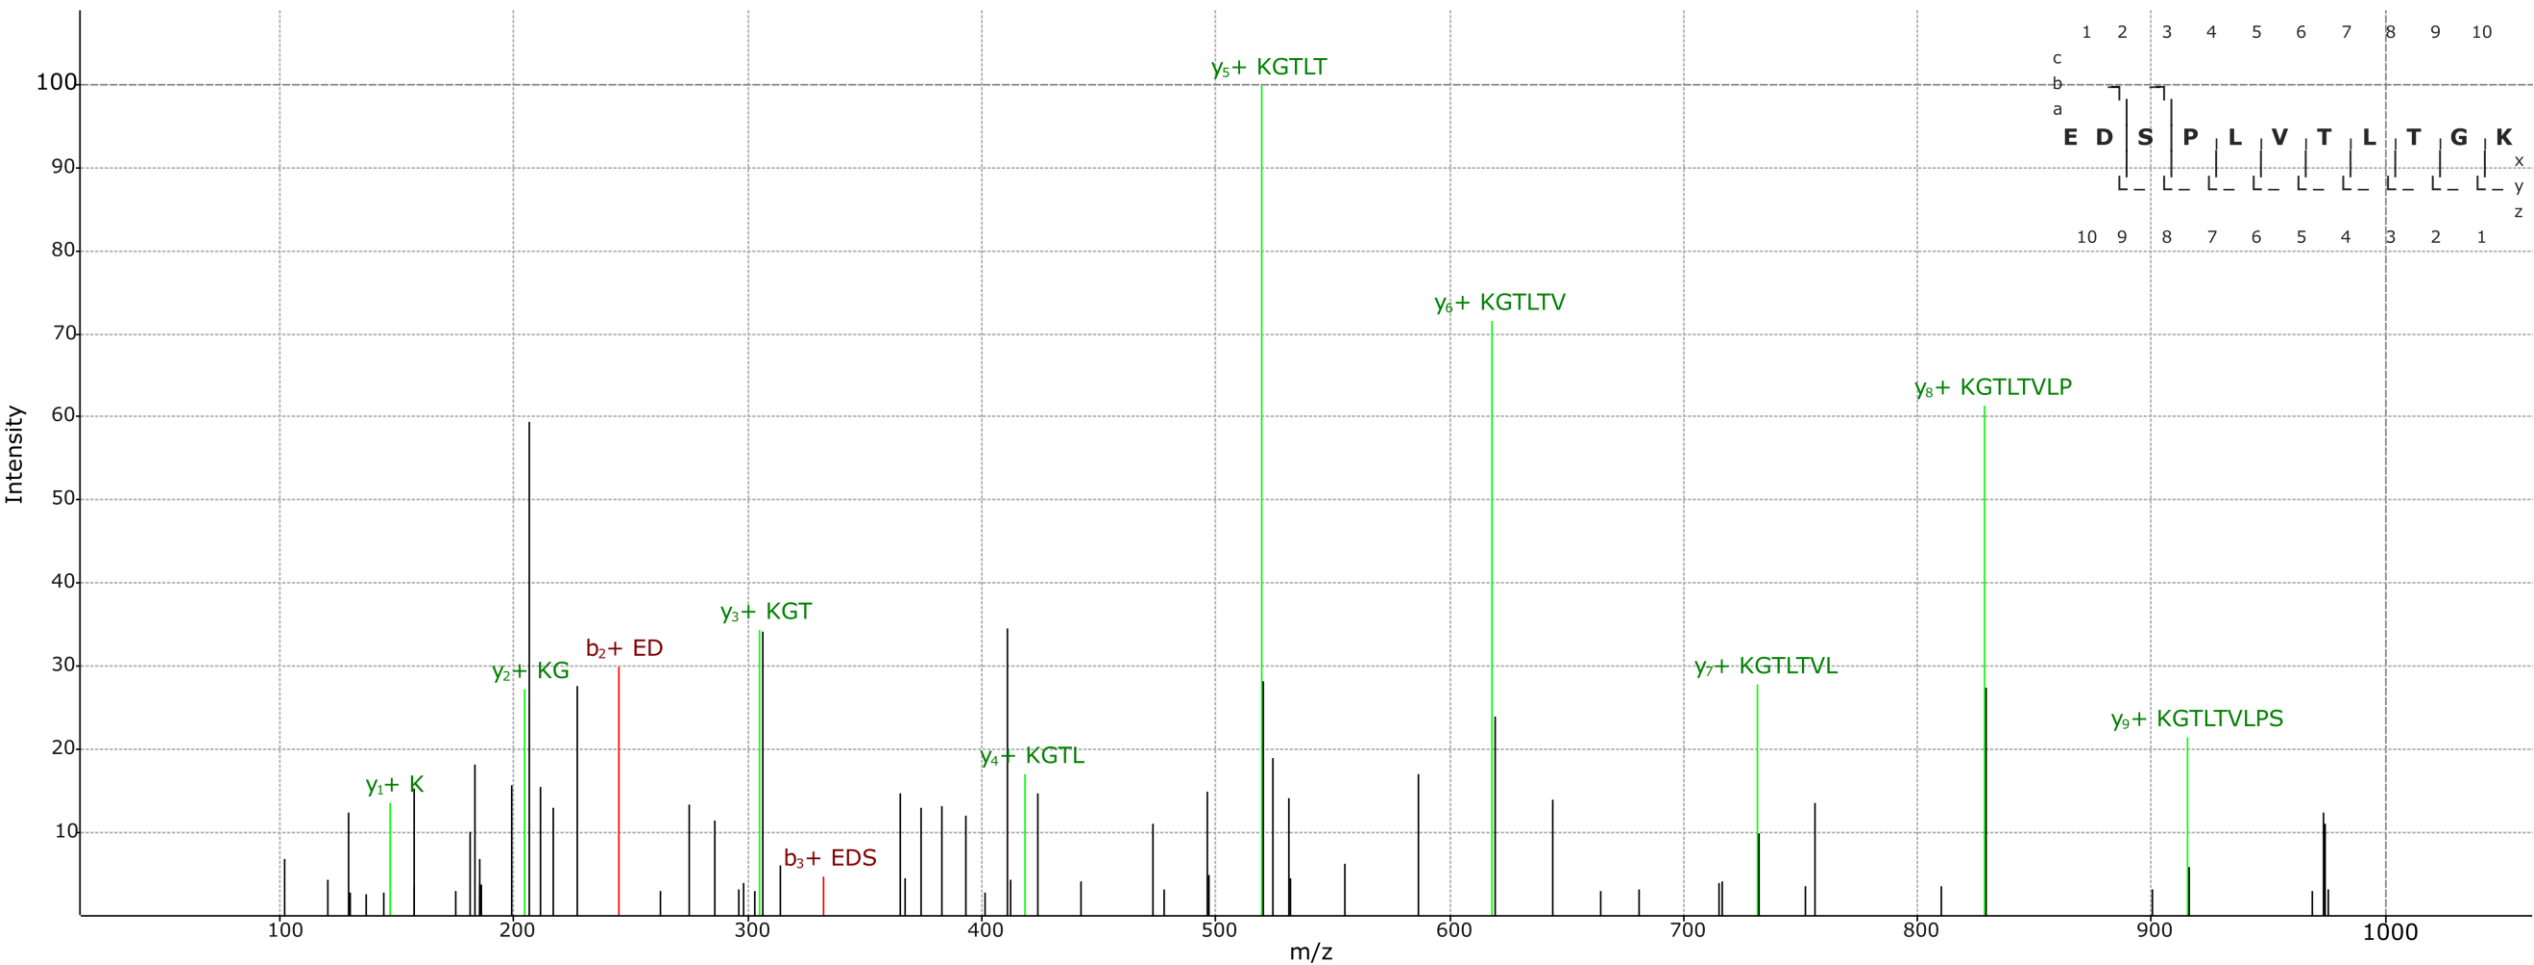

Precursor m/z: 580.3  
Peptide charge: 2  
Score: 7.14E-14

# NSSHWAEEDTILSGVK, N-acetyltransferase YodP

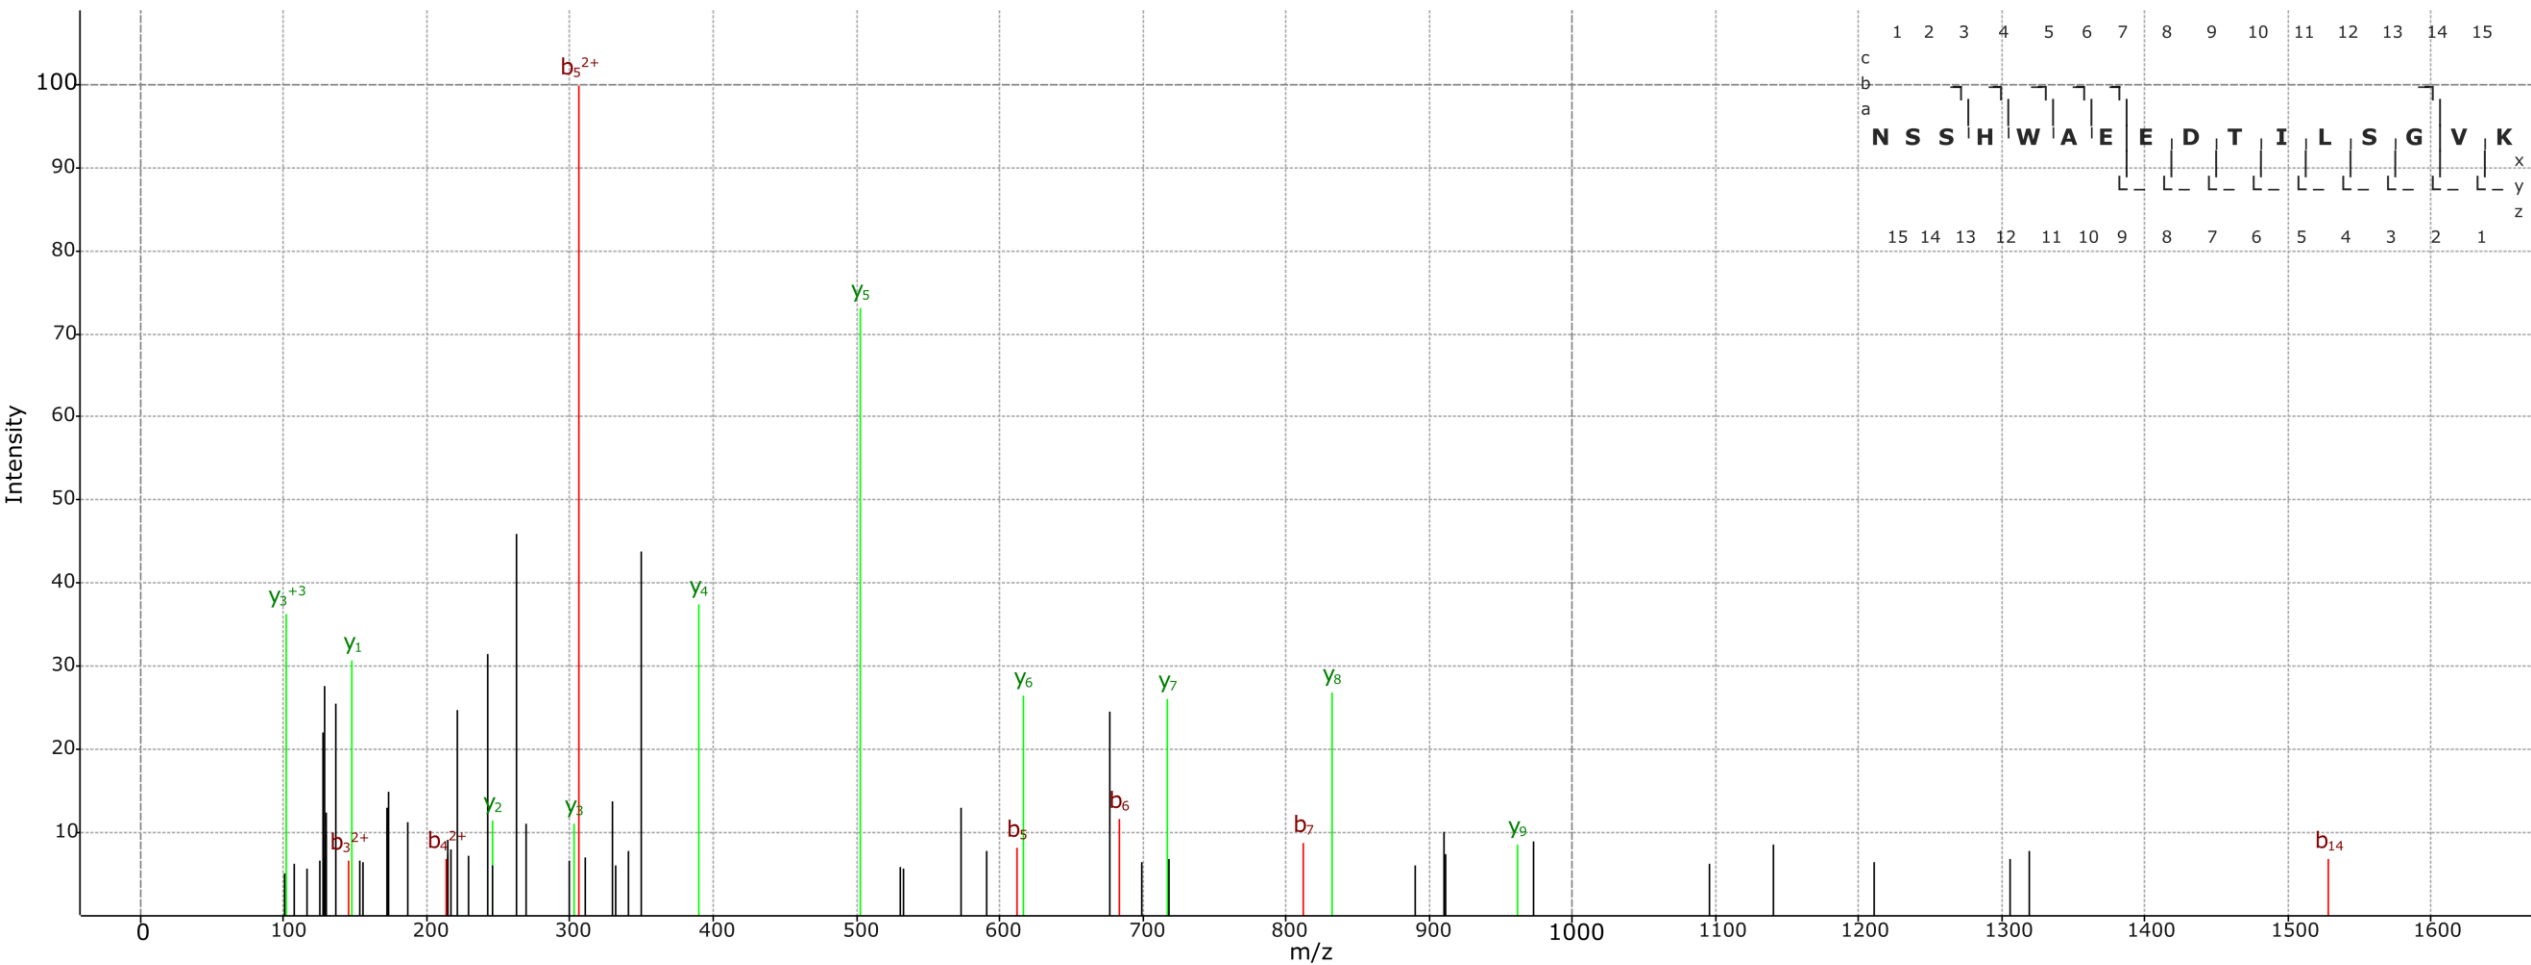

Precursor m/z: 591.6  
Peptide charge: 3  
Score: 8.03E-14

AQASGASIQSTNASYGTEFATETDVHAVK, Small, acid-soluble spore protein gamma-type

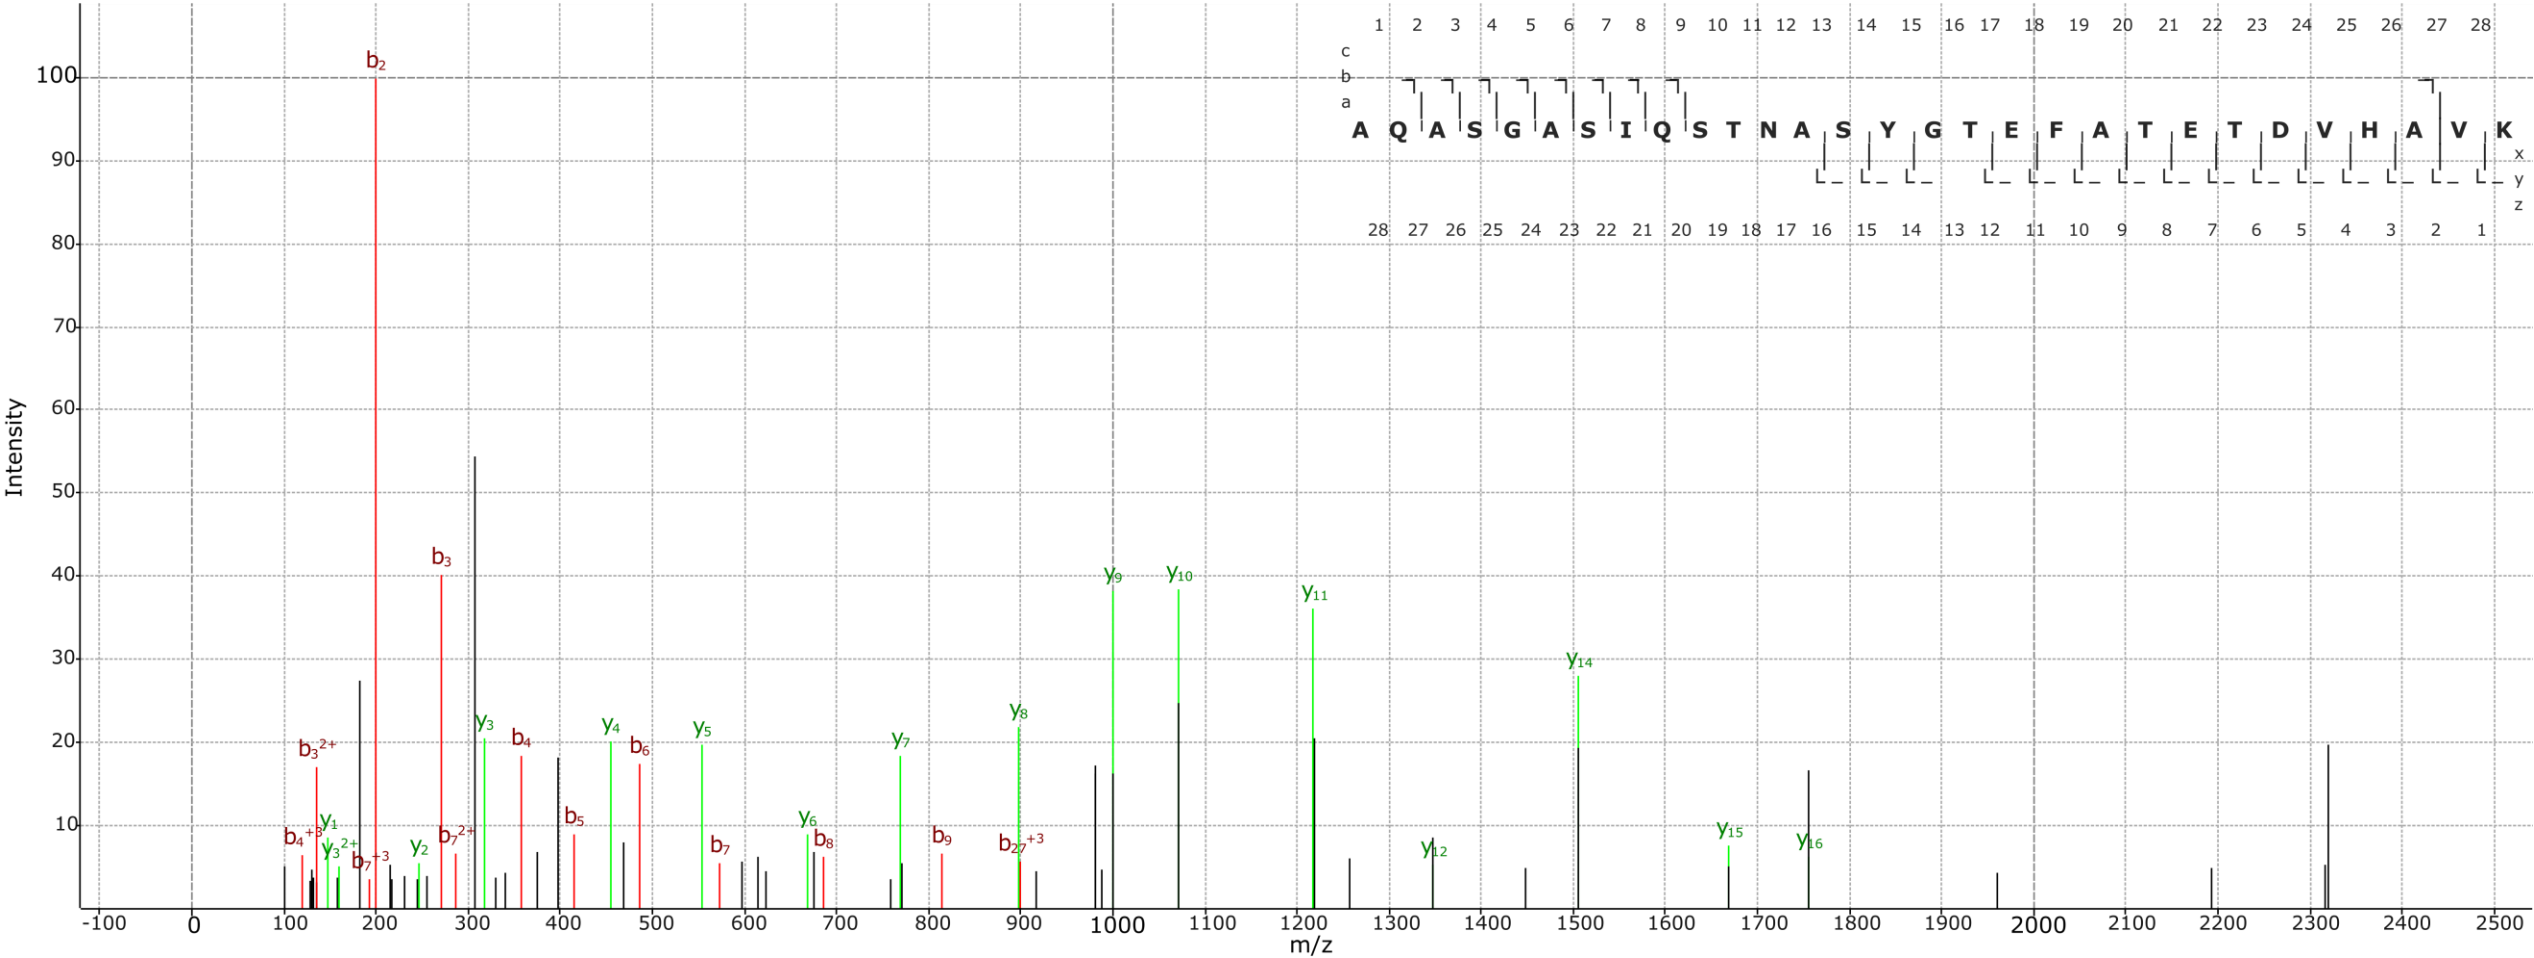

Precursor m/z: 981.5  
Peptide charge: 3  
Score: 3.43E-27

**VLTSQGAEVSHNFLGDK, putative 3-hydroxyacyl-CoA dehydrogenase**

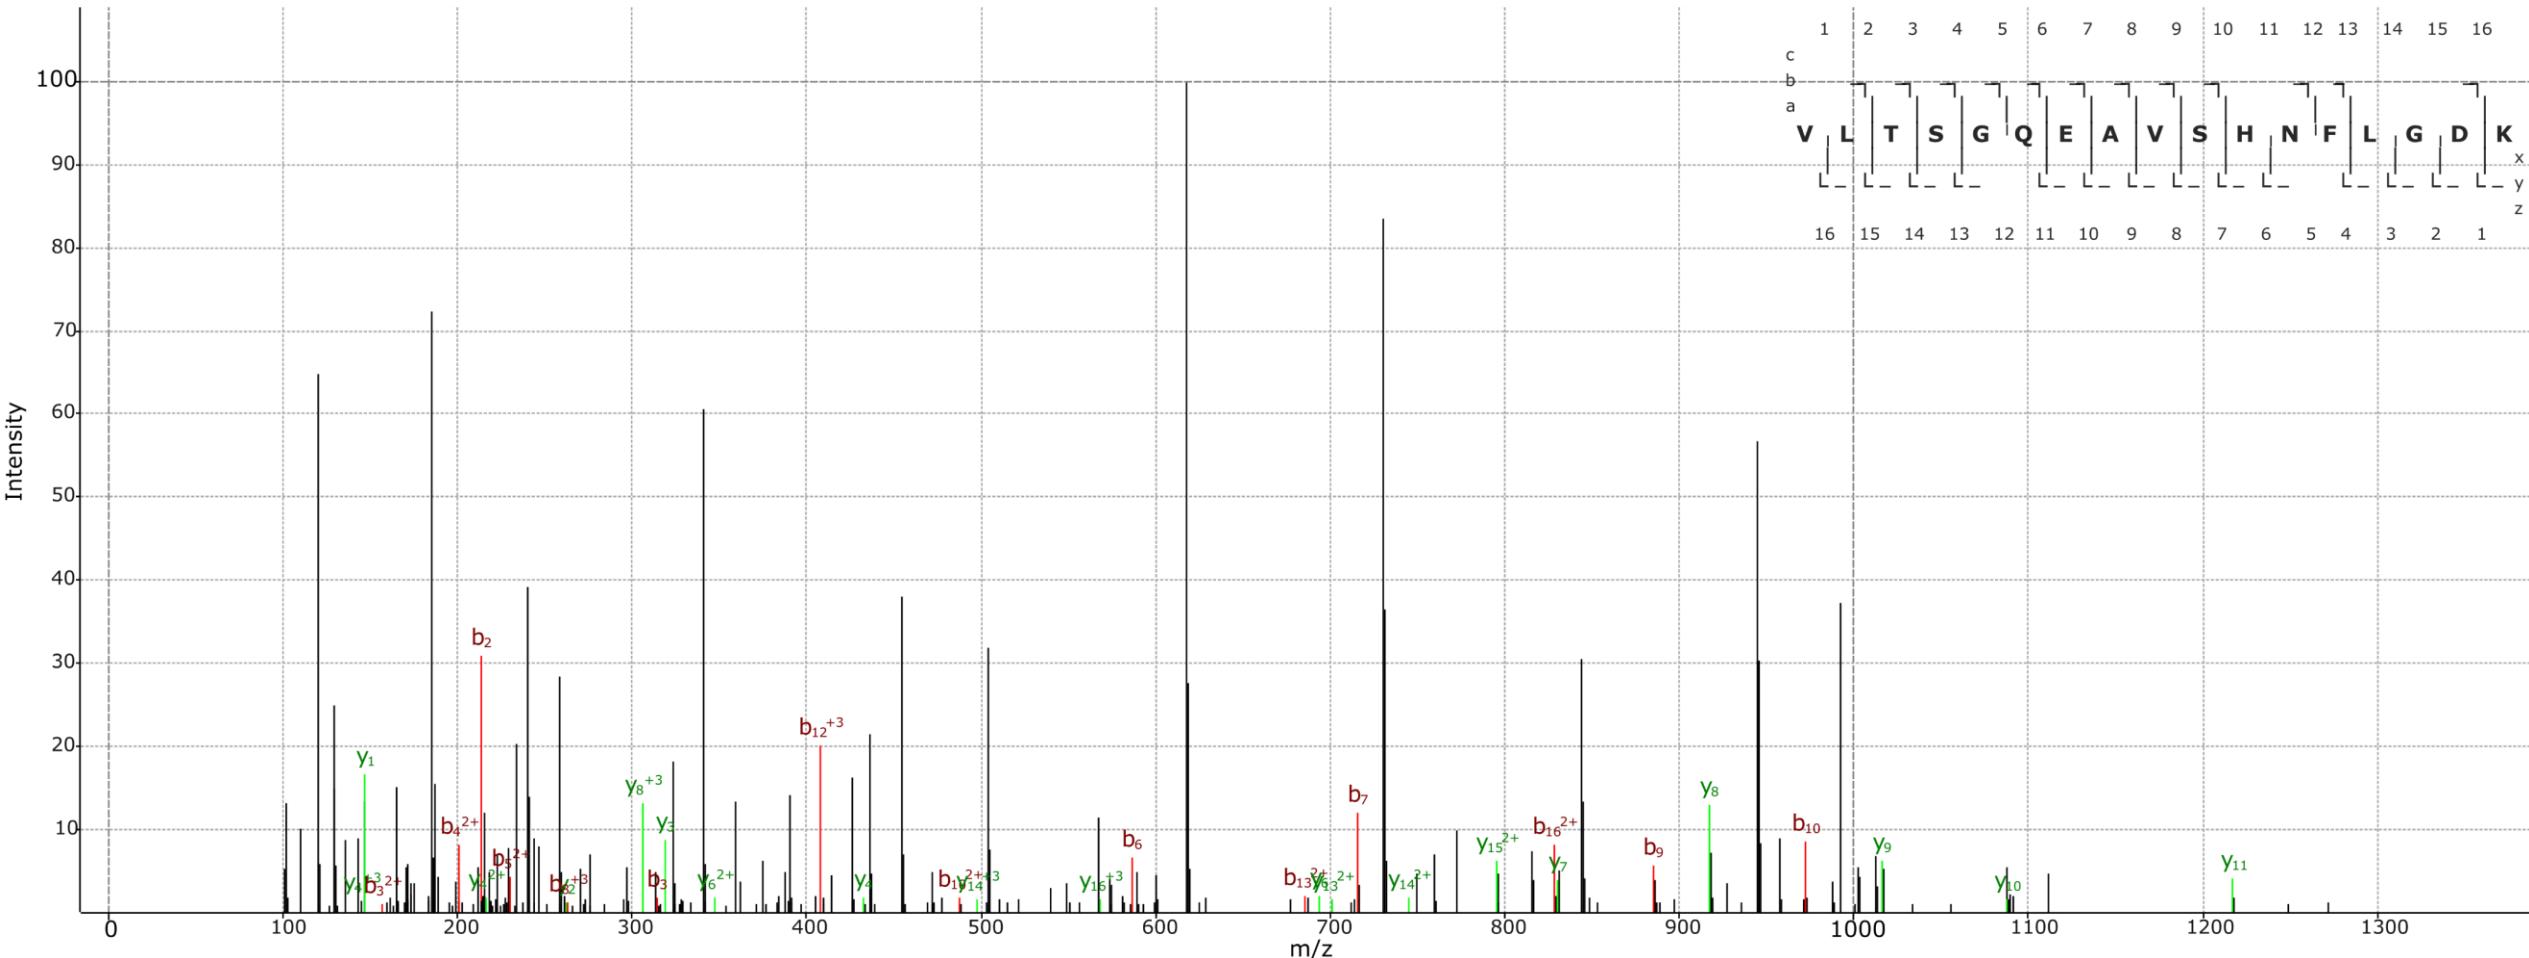

|                 |          |
|-----------------|----------|
| Precursor m/z:  | 601.6    |
| Peptide charge: | 3        |
| Score:          | 2.42E-10 |
